# Supplementary material for: Two-step growth of CsPbI3−xBrx films employing dynamic CsBr treatment: toward all-inorganic perovskite photovoltaics with enhanced stability
Source: Royal Society of Chemistry journal article supplement (doi:10.1039/c9ta05948b), 2019-01-01
Supplement: c9ta05948b1.pdf [file c9ta05948b1.pdf]

## <Electronic Supplementary Information>

# Two-step Growth of $\text{CsPbI}_{3-x}\text{Br}_x$ Films Employing Dynamic CsBr Treatment: Toward All-inorganic Perovskite Photovoltaics with Enhanced Stability

Bhaskar Parida <sup>1)</sup>, Jun Ryu <sup>1)</sup>, Saemon Yoon <sup>1)</sup>, Seojun Lee <sup>1)</sup>, Yejin Seo <sup>1)</sup>, Jung Sang Cho <sup>2)</sup>,  
and Dong-Won Kang <sup>1,\*</sup>

<sup>1)</sup> School of Energy Systems Engineering, Chung-Ang University, Seoul 06974, Republic of Korea

<sup>2)</sup> Department of Engineering Chemistry, Chungbuk National University, 28644, Republic of Korea

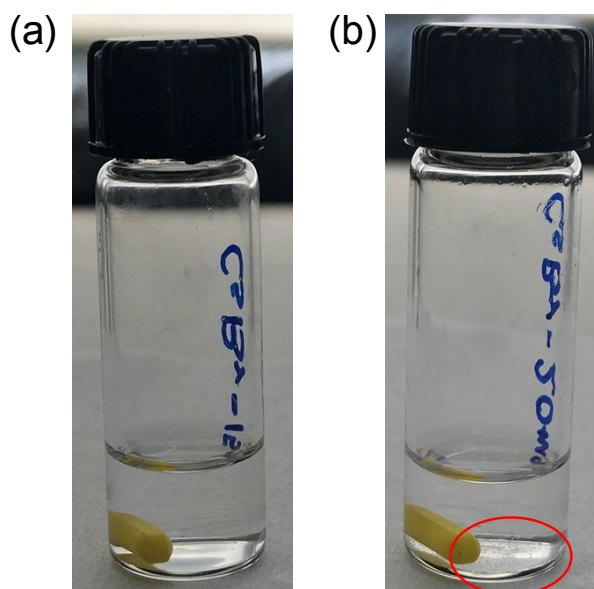

Figure S1. Photographic images showing the solubility of (a) 15 mg and (b) 20 mg CsBr in 1 mL of methanol.

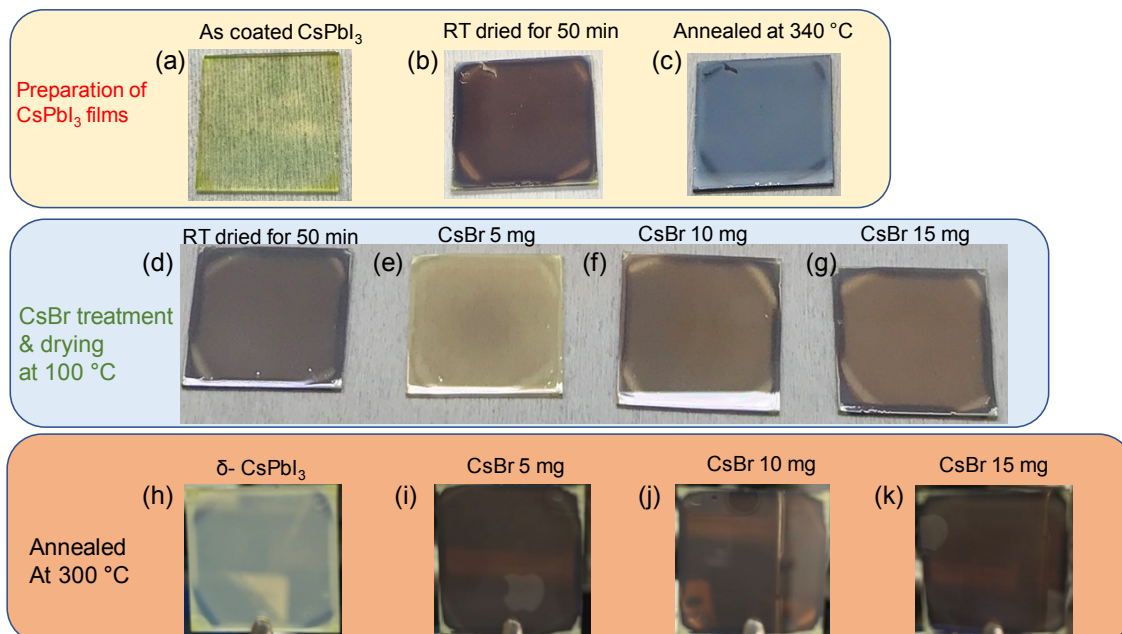

Figure S2. Photographic images of the fabrication process for  $\alpha$ -CsPbI<sub>3-x</sub>Br<sub>x</sub> perovskite films (a-c) without and (e-g) with a dynamic coating of various concentrations of CsBr (5–15 mg) and drying at 100 °C and (i-k) annealing at 300 °C. (d) The  $\alpha$ -CsPbI<sub>3</sub> film prepared using room temperature (RT) drying that (h) degraded to  $\delta$ -CsPbI<sub>3</sub> after annealing at 300 °C.

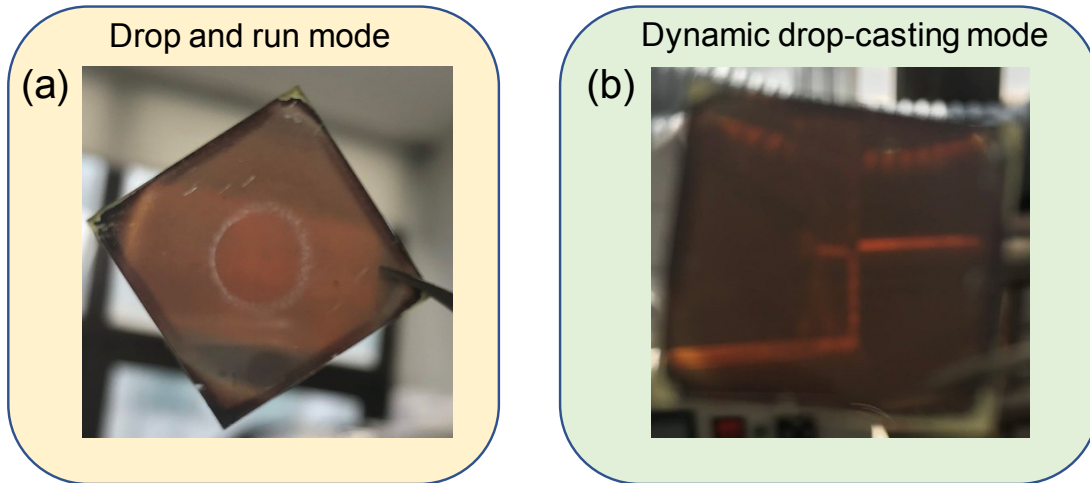

Figure S3. Photographic images of  $\alpha$ -CsPbI<sub>3-x</sub>Br<sub>x</sub> perovskite films prepared using the (a) drop and run and (b) dynamic drop-casting of a 15-mg CsBr solution.

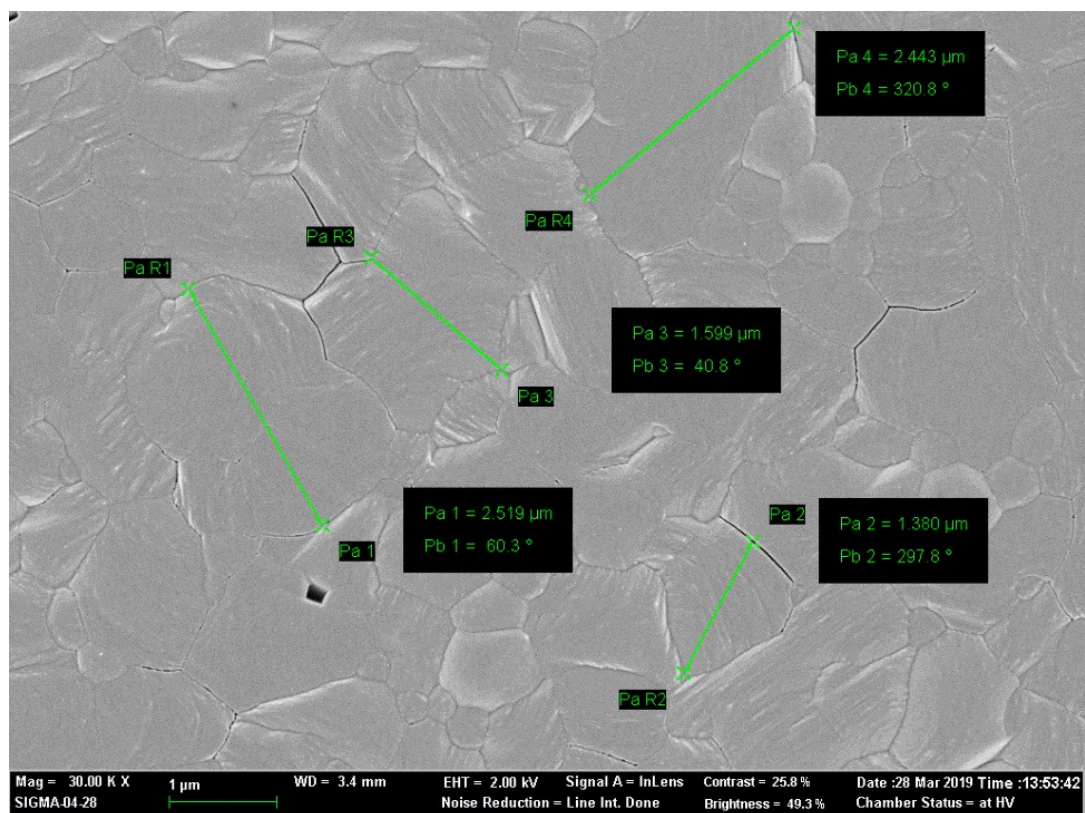

Figure S4. Top-view FE-SEM images of CsBr-15 perovskite film with grain sizes over 2  $\mu\text{m}$ .

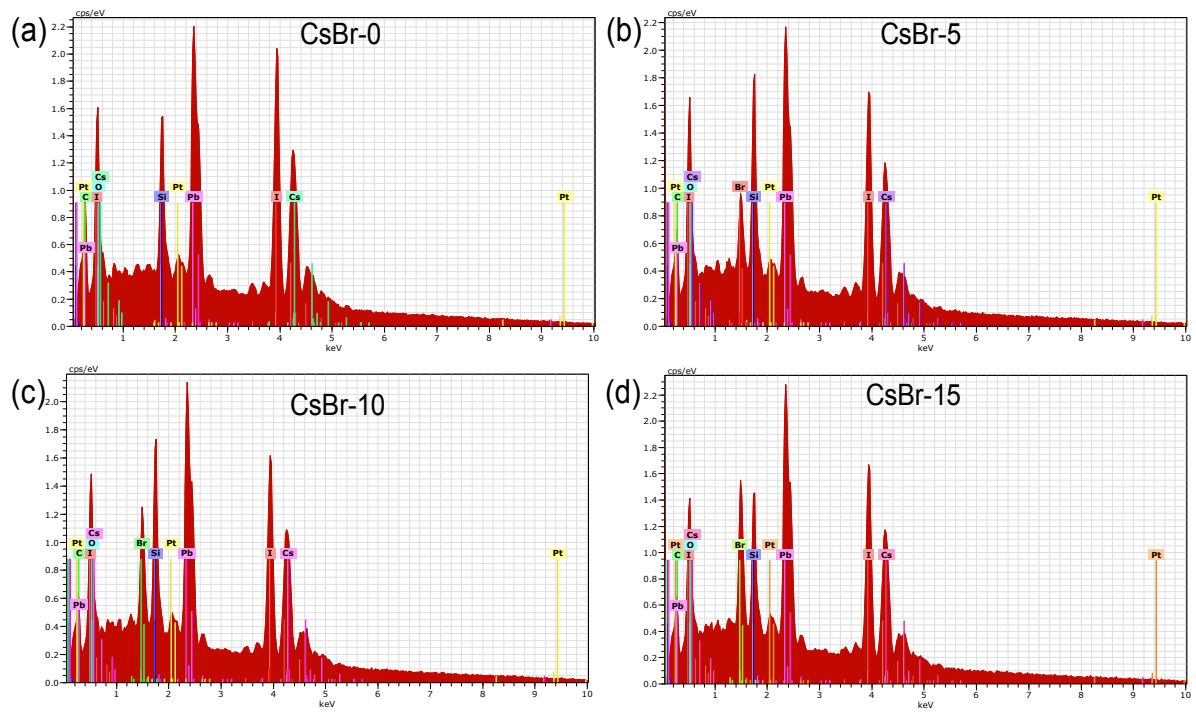

Figure S5. EDX spectra of the (a) CsBr-0, (b) CsBr-5, (c) CsBr-10, and (d) CsBr-15 perovskite films prepared with and without a dynamic CsBr coating.

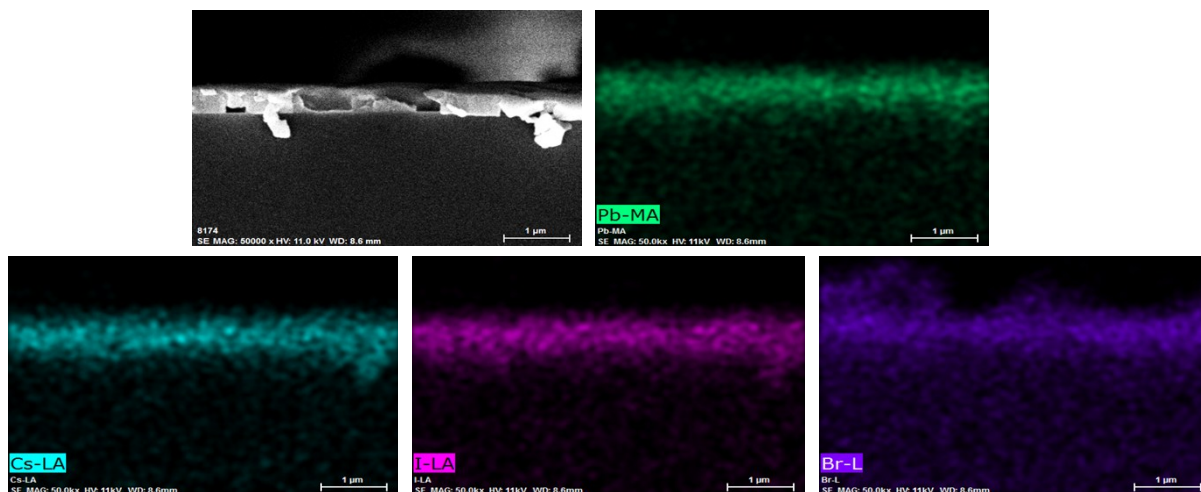

Figure S6. Cross-sectional EDX mapping profile of the CsBr-15 perovskite film.

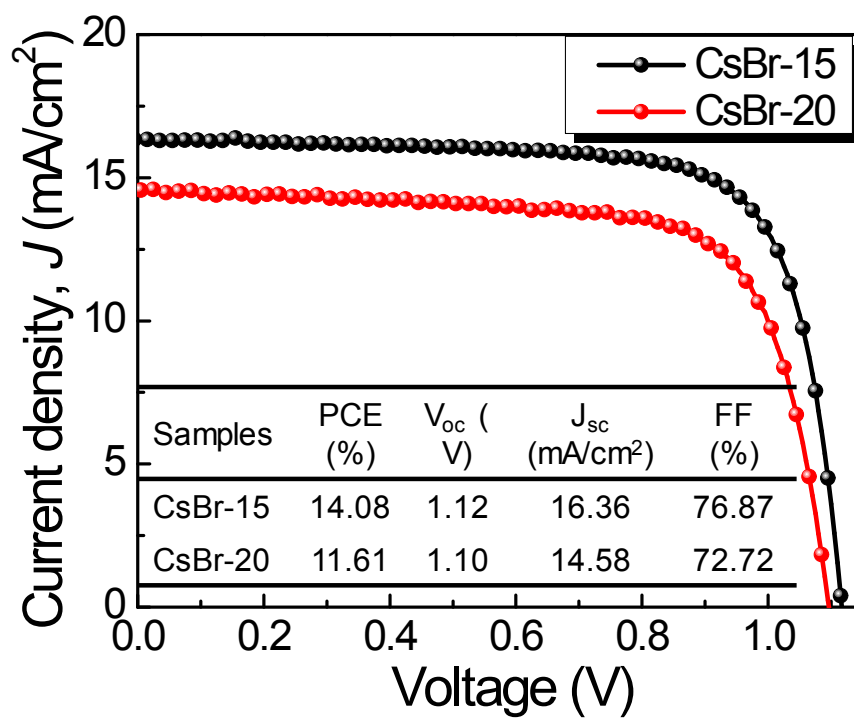

Figure S7. J–V characteristic curves for the CsPbI<sub>3-x</sub>Br<sub>x</sub> inorganic PSCs fabricated with a dynamic CsBr coating using the increased precursor concentration (20 mg/mL, heated at 50 °C) as well as the property of the champion CsBr-15 device (CsBr 15 mg/mL at room temperature).

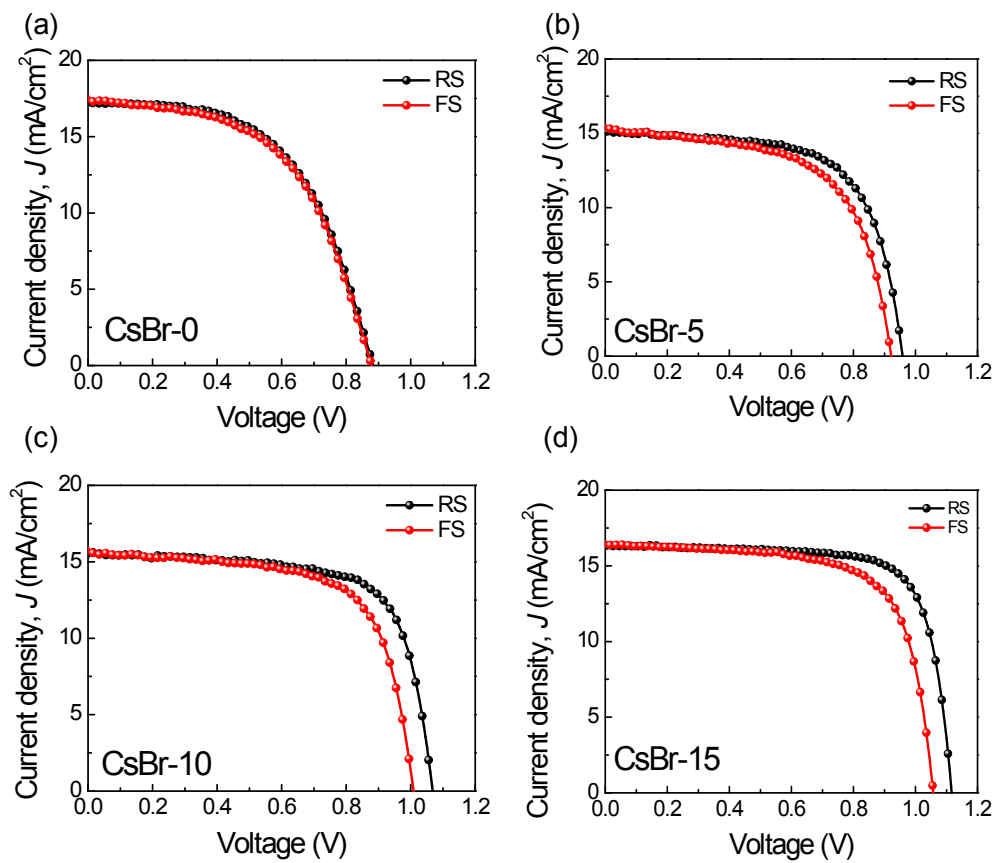

Figure S8. Hysteresis behavior of the CsPbI<sub>3-x</sub>Br<sub>x</sub> PSCs fabricated (a) without CsBr and (b-d) with dynamic CsBr-5, CsBr-10, and CsBr-15 coatings as revealed by reverse and forward scans.



Table S1. Hysteresis behavior of the CsPbI<sub>3-x</sub>Br<sub>x</sub> PSCs fabricated (a) without CsBr and (b-d) with dynamic treatment CsBr-5, CsBr-10, and CsBr-15 coatings as revealed by reverse and forward scans.

| Sample  | Direction | PCE (%) | V <sub>oc</sub> (V) | J <sub>sc</sub> (mA/cm <sup>2</sup> ) | FF (%) |
|---------|-----------|---------|---------------------|---------------------------------------|--------|
| CsBr-0  | RS        | 8.40    | 0.88                | 17.20                                 | 56.47  |
|         | FS        | 8.33    | 0.87                | 17.44                                 | 54.69  |
| CsBr-5  | RS        | 9.63    | 0.96                | 15.23                                 | 66.02  |
|         | FS        | 8.66    | 0.92                | 15.58                                 | 60.46  |
| CsBr-10 | RS        | 11.81   | 1.06                | 15.54                                 | 71.33  |
|         | FS        | 10.66   | 1.01                | 15.88                                 | 66.77  |
| CsBr-15 | RS        | 14.08   | 1.12                | 16.36                                 | 76.87  |
|         | FS        | 12.18   | 1.06                | 16.29                                 | 69.90  |

Table S2. A summary of stability results on recently reported inorganic PSCs.

| Ref. No.                  | Device structure                                                                                  | Temp. (°C) | R.H. (%) | Initial PCE (%) | PCE Decay (%) | Storage Time (h) |
|---------------------------|---------------------------------------------------------------------------------------------------|------------|----------|-----------------|---------------|------------------|
| N <sub>2</sub> atmosphere |                                                                                                   |            |          |                 |               |                  |
| R2.1                      | ITO/ZnO/ Cs <sub>1.2</sub> PbI <sub>2</sub> Br <sub>1.2</sub> /P3HT/Au                            | 70         | < 20     | 9.8             | 30            | 500              |
| R2.2                      | FTO/NiMgLiO/CsPbI <sub>2</sub> Br /PCBM/BCP/Ag                                                    | 85         | < 20     | 9.14            | 10            | 500              |
| R2.3                      | FTO/PTAA/CsPbI <sub>3</sub> /PCBM/BCP/Ag                                                          | RT         | < 10     | 13.32           | 15            | 720              |
| R2.4                      | FTO/TiO <sub>2</sub> /CsPbI <sub>3</sub> -PTABr/Spiro-OMeTAD/Au                                   | RT         | < 10     | 17.06           | 9             | 500              |
| <b>Our work</b>           | ITO/TiO <sub>2</sub> /CsPbI <sub>3-x</sub> Br <sub>x</sub> /P3HT/Au                               | RT         | <10      | 14.08           | 30            | 1200             |
| Air atmosphere            |                                                                                                   |            |          |                 |               |                  |
| R2.5                      | FTO/TiO <sub>2</sub> /Cs <sub>0.925</sub> K <sub>0.075</sub> PbI <sub>2</sub> Br /Spiro-OMeTAD/Au | RT         | 20       | 10.0            | 20            | 144              |
| [24]                      | FTO/TiO <sub>2</sub> /CsPbI <sub>2.98</sub> Br <sub>0.2</sub> /Spiro-OMeTAD/Au                    | RT         | 20       | 10.92           | 0             | 192              |
| R2.6                      | FTO/TiO <sub>2</sub> /CsPbI <sub>2</sub> Br <sub>2</sub> /Spiro-OMeTAD/Au                         | RT         | 25       | 7.31            | 50            | 100              |
| [14]                      | FTO/TiO <sub>2</sub> /CsPb <sub>0.96</sub> Bi <sub>0.04</sub> I <sub>3</sub> /CuI/Au              | RT         | 55       | 13.21           | 32            | 168              |
| R2.7                      | FTO/TiO <sub>2</sub> /CsPbI <sub>3</sub> QDs/Spiro-OMeTAD/MoO <sub>x</sub> /Al                    | RT         | 40-60    | 10.77           | 74            | 48               |
| <b>Our work</b>           | ITO/TiO <sub>2</sub> /CsPbI <sub>3-x</sub> Br <sub>x</sub> /P3HT/Au                               | 85         | 40       | 14.08           | 0             | 48               |

[R2.1] L. A. Frolova, Q. Chang, S. Y. Luchkin, D. Zhao, A. F. Akbulatov, N. N. Dremova, A. V. Ivanov, E. E. M. Chia, K. J. Stevenson and P. A. Troshin, Efficient and stable all-inorganic perovskite solar cells based on nonstoichiometric Cs<sub>x</sub>PbI<sub>2</sub>Br<sub>x</sub> (x > 1) alloys, *J. Mater. Chem. C*, 2019,7, 5314-5323.

[R2.2] S. Zhang, S. Wu, W. Chen, H. Zhu, Z. Xiong, Z. Yang, C. Chen, R. Chen, L. Han and W. Chen, Solvent engineering for efficient inverted perovskite solar cells based on inorganic CsPbI<sub>2</sub>Br light absorber, *Materials Today Energy* 2018, 8, 125-133.

- [R2.3] T. Wu, Y. Wang, Z. Dai, D. Cui, T. Wang, X. Meng, E. Bi, X. Yang, and L. Han, Efficient and Stable CsPbI<sub>3</sub> Solar Cells via Regulating Lattice Distortion with Surface Organic Terminal Groups, *Adv. Mater.* 2019, 1900605.
- [R2.4] Y. Wang, T. Zhang, M. Kan, Y. Zhao, Bifunctional Stabilization of All-Inorganic  $\alpha$ -CsPbI<sub>3</sub> Perovskite for 17% Efficiency Photovoltaics, *Journal of the American Chemical Society*, 140 (2018) 12345-12348.
- [R2.5] J.K. Nam, S.U. Chai, W. Cha, Y.J. Choi, W. Kim, M.S. Jung, J. Kwon, D. Kim, J.H. Park, Potassium Incorporation for Enhanced Performance and Stability of Fully Inorganic Cesium Lead Halide Perovskite Solar Cells, *Nano Letters*, 17 (2017) 2028-2033.
- [R2.6] J. Lu, S-C. Chen, and Q. Zheng, Defect Passivation of CsPbIBr<sub>2</sub> Perovskites for High-Performance Solar Cells with Large Open-Circuit Voltage of 1.28 V, *ACS Appl. Energy Mater.* 2018, 1, 5872–5878.
- [R2.7] A. Swarnkar, A.R. Marshall, E.M. Sanhira, B.D. Chernomordik, D.T. Moore, J.A. Christians, T. Chakrabarti, J.M. Luther, Quantum dot–induced phase stabilization of  $\alpha$ -CsPbI<sub>3</sub> perovskite for high-efficiency photovoltaics, *Science*, 354 (2016) 92-95.

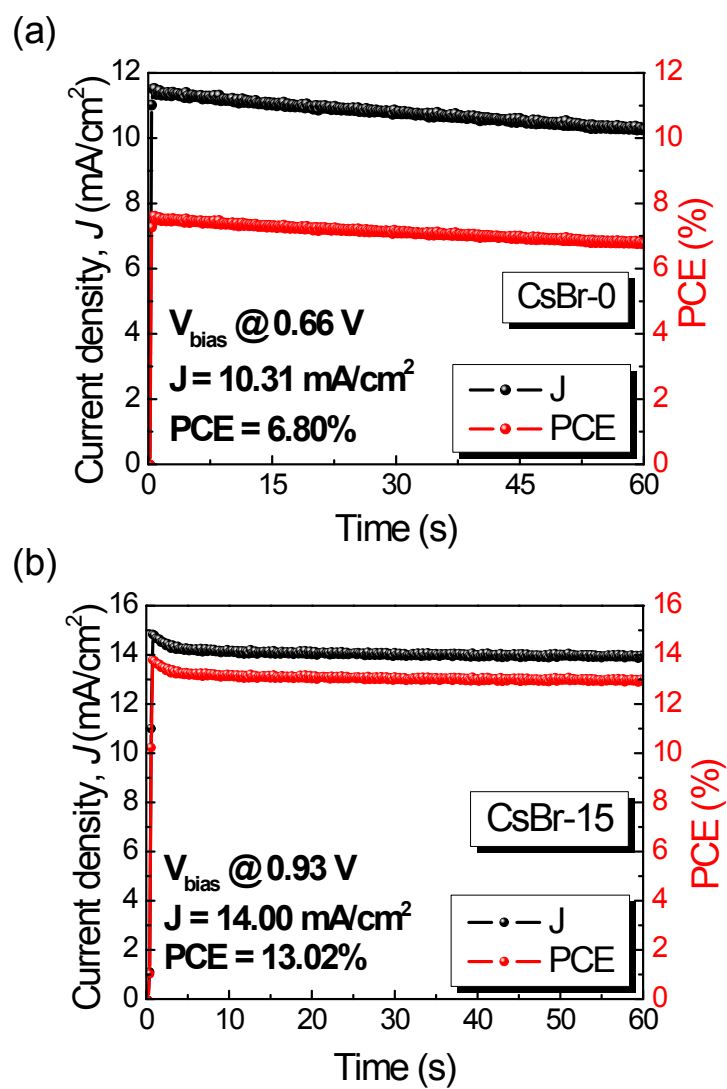

Figure S9. Stabilized photocurrent and PCE of the (a) CsBr-0 and (b) CsBr-15 inorganic PSCs.

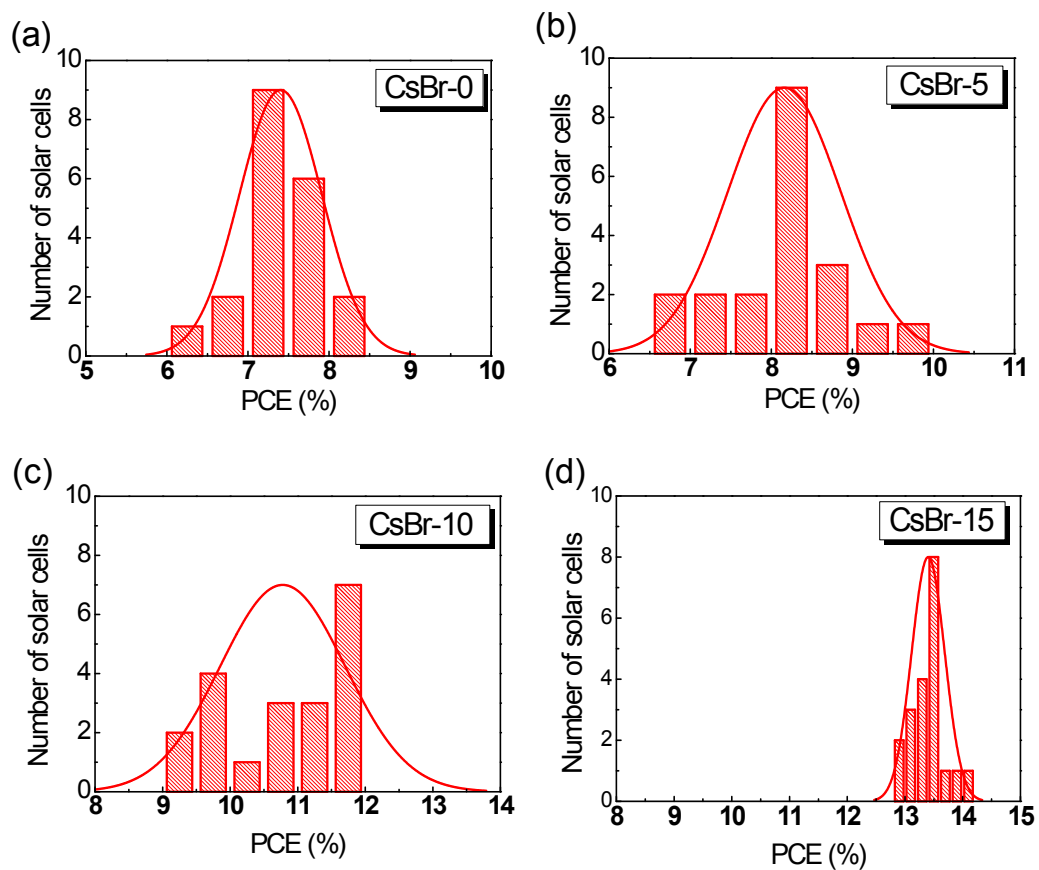

Figure S10. PCE distribution histograms for 20 devices of the  $\text{CsPbI}_{3-x}\text{Br}_x$  PSCs fabricated (a) without CsBr ( $\text{CsBr-0}$ ,  $\text{CsPbI}_3$ ) and (b-d) with dynamic CsBr-5, CsBr-10, and CsBr-15 treatment.

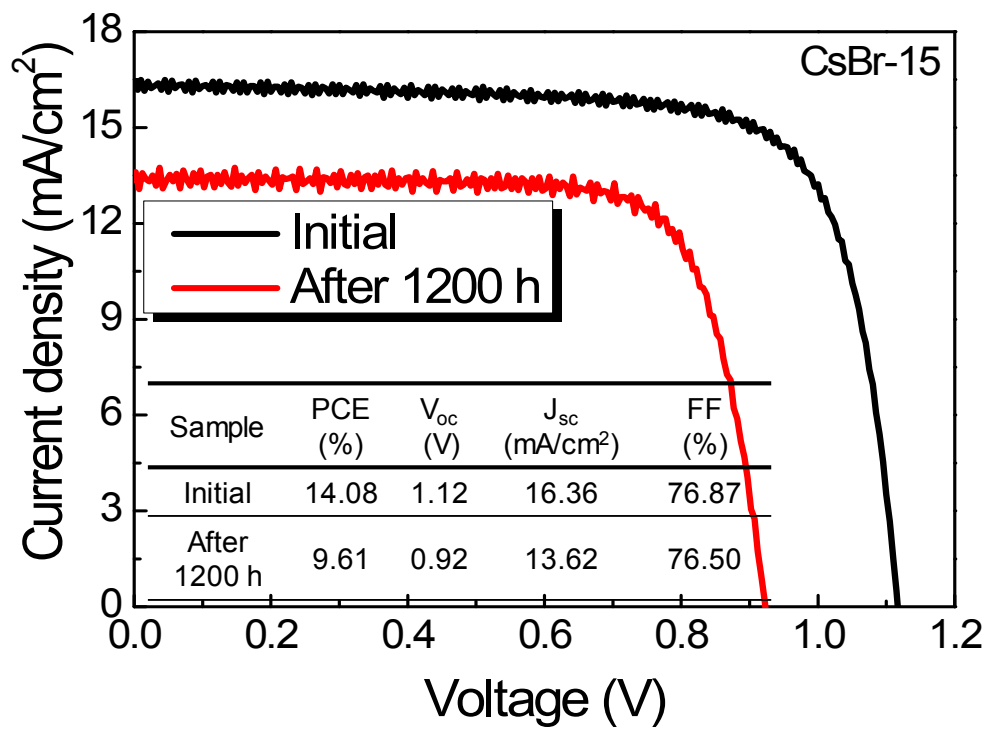

Figure S11. J-V curves (measured in atmospheric air ambient) of the unencapsulated CsBr-15 all-inorganic perovskite solar cells stored in a nitrogen-ambient for over 1200 h. The inset table presents the performance of fresh and stored devices.

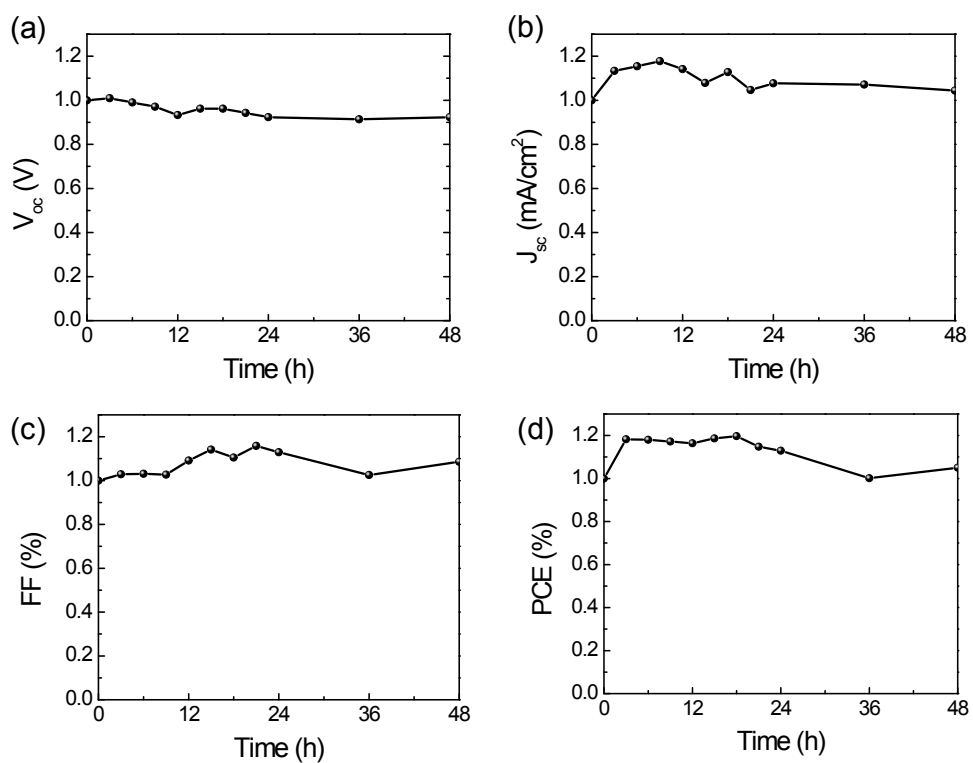

Figure S12. Normalized (a)  $V_{oc}$ , (b)  $J_{sc}$  (c) FF, and (d) PCE as a function of time for the CsBr-15 PSC without encapsulation, measured under ambient air at the temperature of 85 °C and RH of 40% for 48 h.
